1

2

3 Molecular mechanisms of *Plasmodium* development in male and female

4 *Anopheles* mosquitoes

5

6 **Short title:** Molecular mechanisms of *Plasmodium* development in mosquitoes

7

8

9 Asako Haraguchi<sup>1</sup>, Makoto Takano<sup>1</sup>, Jun Hakozaiki<sup>1</sup>, Kazuhiko Nakayama<sup>1</sup>, Sacré

10 Nakamura<sup>1</sup>, Yasunaga Yoshikawa<sup>2</sup>, Shinya Fukumoto<sup>3</sup>, Kodai Kusakisako<sup>1</sup>, Hiromi Ikadai<sup>1\*</sup>

11

12 <sup>1</sup>Laboratory of Veterinary Parasitology, School of Veterinary Medicine, Kitasato University,

13 Towada, Aomori 034-8628, Japan

14 <sup>2</sup>Laboratory of Veterinary Biochemistry, School of Veterinary Medicine, Kitasato

15 University, Towada, Aomori 034-8628, Japan

16 <sup>3</sup>National Research Center for Protozoan Diseases, Obihiro University of Agriculture and

17 Veterinary Medicine, Inada, Obihiro 080-8555, Japan

18

19

20 \*Corresponding author

21 E-mail: ikadai@vmas.kitasato-u.ac.jp (HI)

## 22 **Abstract**

23           Vector competence influences the ability of *Anopheles* mosquitoes to transmit  
24 *Plasmodium* parasites. The aim of this study was to determine the competence of male and  
25 female *Anopheles* mosquitoes to support the development of *Plasmodium* parasites. Male and  
26 female *A. stephensi* (STE2 strain) were infected with *in vitro*-cultured *P. berghei* (ANKA  
27 strain) ookinetes. We found that the number of oocysts produced was higher in males than in  
28 females. RNA-seq analysis of male and female mosquitoes injected with *P. berghei* ookinetes  
29 showed that predominantly genes of unknown function changed in expression levels in  
30 response to ookinete infection; however, further studies are required to elucidate their  
31 functions. Moreover, male mosquitoes were injected with *in vitro*-cultured *P. falciparum*  
32 (3D7 strain) gametocytes or zygotes. The development of *P. falciparum* in males was  
33 detected using nested polymerase chain reaction. We found the DNA content was higher on  
34 day 15 than on day 0, indicating that *P. falciparum* developed in the mosquito hemocoel. This  
35 study revealed promising new mechanisms underlying the interactions between *Plasmodium*  
36 and mosquitoes.

37

38 **Keywords:** vector competence; malaria; *Plasmodium berghei*; *Plasmodium falciparum*;  
39 *Anopheles stephensi*

40

## 41 **Author Summary**

42           *Anopheles* mosquitoes transmit *Plasmodium* parasites that cause malaria disease.  
43 Vector competence is the ability of vectors to support pathogen development. The aim of this  
44 study was to determine the competence of male and female mosquitoes for *Plasmodium*  
45 parasites. Oocysts were formed in both male and female mosquitoes injected with ookinetes

46 from *in vitro*-cultured *Plasmodium berghei*, which causes malaria in mice. The number of  
47 oocysts was higher in males, indicating that the competence in males was higher than that in  
48 females. RNA-seq analysis showed that the expression of genes of unknown function was  
49 highly variable in males and females. The genes defining the competence factors need further  
50 study, but the results indicate novel genes may be discovered. Furthermore, the development  
51 of *Plasmodium falciparum*, which causes the most severe malaria in humans, in male  
52 mosquitoes injected with *in vitro*-cultured gametocytes or zygotes was detected. As male  
53 mosquitoes do not suck blood, this method may allow us to experiment with *Plasmodium*  
54 more safely.

55

## 56 **Introduction**

57 Malaria is a serious protozoan disease that infects 200 million and kills 400 000  
58 people per year [1]. It is caused by *Plasmodium* parasites transmitted by *Anopheles*  
59 mosquitoes [2–4]. Soon after feeding on an infected vertebrate host, the gametocytes form  
60 gametes that, after fertilization, give rise to zygotes that, within approximately 24 h, develop  
61 into motile ookinetes. Ookinetes traverse the mosquito midgut epithelial cells and  
62 differentiate into early oocysts attached to the basal side of the epithelium, facing the  
63 hemocoel. Within 10–15 d, the oocysts mature, releasing thousands of sporozoites into the  
64 hemolymph. These sporozoites invade the salivary glands and are transmitted to the next host  
65 when mosquitoes feed on another vertebrate host.

66 Less than one-tenth of the gametocytes ingested by a female mosquito become  
67 ookinetes, and less than one-tenth of the ookinetes develop into oocysts [3]. Thus,  
68 *Plasmodium* parasites undergo high losses during their development in the mosquito gut. This  
69 is a vulnerable period in the life cycle of the parasites and a vulnerable stage for transmission  
70 control [3,5,6].

71 Differences in susceptibility to pathogens between male and female hosts have been  
72 reported in various animal species. Male mice are more susceptible to *Babesia microti* and *P.*  
73 *berghei* than females [7,8]. Vector competence is the ability of vectors to support pathogen  
74 development and is one of the factors that define the ability of vectors to transmit pathogens  
75 [2,9]. In the dipteran tsetse fly (*Glossina morsitans*), a blood-feeder and pathogen vector like  
76 the mosquito, both males and females feed on blood and transmit *Trypanosoma brucei*. Male  
77 and female vector competence differ, with male salivary glands being more conducive to *T.*  
78 *brucei* development than female salivary glands [10]. Male mosquitoes do not feed on blood,  
79 and there are no reports examining male mosquito competence.

80 It has been reported that *in vitro*-cultured *P. berghei* ookinetes microinjected into the  
81 body cavity (hemocoel) of female *Anopheline* mosquitoes develop into oocysts and form  
82 sporozoites [11,12]. Microinjection of *P. gallinaceum* ookinetes into the dipteran fruit fly  
83 (*Drosophila melanogaster*) also yields oocysts and sporozoites [13]. Fruit flies are not natural  
84 hosts, and oocysts are not formed via blood feeding or oral ingestion of ookinetes; however,  
85 oocysts and sporozoites are formed when microinjected into the hemocoel, which indicates  
86 that *P. gallinaceum* cannot traverse the fruit fly midgut wall [13]. Moreover, that  
87 macrophages in the fruit fly act as a *P. gallinaceum* exclusion mechanism was clarified by  
88 studying fruit flies microinjected with *P. gallinaceum* in detail [13]. Thus, microinjection can  
89 be used to study the *Plasmodium* exclusion system or vector competence. Recently, RNA-seq  
90 analysis has emerged as a simple and powerful tool for investigating the *Plasmodium* vector  
91 competence of mosquitoes [14,15].

92 The aim of this study was to compare the competence of male and female *Anopheles*  
93 mosquitoes for *Plasmodium* by determining oocyst numbers and conducting RNA-seq  
94 analysis to investigate underlying molecular mechanisms.

95

## 96 **Results**

### 97 **Development of *P. berghei* in male mosquitoes injected with**

### 98 **ookinetes**

99 *P. berghei* oocysts were formed in male and female mosquitoes at 14 d post injection  
100 of 2000 ookinetes (Fig 1A). Oocysts were formed in the esophagus, dorsal diverticula, crop,  
101 foregut, midgut, Malpighian tubules, hindgut, rectum, and inner abdominal wall of both  
102 males and females. At the esophagus, dorsal diverticula, and crop, a median of 42.5 and 9.5  
103 oocysts formed in males and females, respectively. At the foregut and midgut, a median of  
104 9.5 and 6.0 oocytes was observed in males and females, respectively. In the Malpighian tube,  
105 hindgut, and rectum, a median of 18.5 and 5.0 oocytes was detected in males and females,  
106 respectively. Last, at the abdominal wall, a median of 60.5 and 30.0 oocytes formed in males  
107 and females, respectively (Fig 1B). Oocysts were formed mostly at the esophagus, dorsal  
108 diverticula, crop, and abdominal wall in both males and females. In addition, more oocysts  
109 were formed in males than in females at every site. At 28 d post injection, *P. berghei*  
110 sporozoites were associated with the salivary glands, dorsal diverticula, crop, wings, and legs  
111 in males, and with the salivary glands, wings, and legs in females (Fig 1C). Mice infection  
112 was confirmed at 4 to 6 d post-tail-vein administration of 2000–10000 sporozoites from the  
113 salivary glands and whole body of male- and female-injected mosquitoes (S1 Table). When  
114 mice were fed with injected females, infection was confirmed 3 d post-blood feeding,  
115 indicating that *P. berghei* sporozoites formed in both males and females were infectious to  
116 mice.

117

118 **Fig 1. Oocyst and sporozoite formation in male and female mosquitoes injected with**

119 ***Plasmodium berghei* ookinetes. (A) Oocysts in male and female mosquitoes viewed with a**

120 fluorescence microscope at 14 d after injection with 2000 GFP-expressing *P. berghei*  
121 ookinetes. DIC, differential interference contrast microscopy. (B) Number of oocysts formed  
122 at each site in males (n = 20) and females (n = 20). Mosquitoes were dissected at 14 d post  
123 injection. EP: esophagus, dorsal diverticula, and crop; MG: foregut and midgut; HG:  
124 Malpighian tube, hindgut, and rectum; AW: abdominal wall. The horizontal bar indicates the  
125 median value. Mann–Whitney test was used for comparison (\*\*  $p < 0.01$ ). Data are  
126 expressed as the pooled results of replicates. (D) Sporozoites in male and female mosquitoes  
127 under a fluorescence microscope at 28 d post injection with 2000 *P. berghei* GFP-expressing  
128 ookinetes.

129

## 130 **Higher oocyst number in male than in female mosquitoes**

131 When 2000 ookinetes were injected into male and female mosquitoes, a median of  
132 132 and 51 oocysts formed in males and females, respectively (Fig 2A). When 5000  
133 ookinetes were injected, the median number of oocysts was 125 and 57 in males and females,  
134 respectively (Fig 2B). In both set-ups, the number of oocysts was significantly higher in  
135 males than in females ( $p < 0.01$ – $0.05$ ) and the prevalence was 100% in all mosquito groups.

136

### 137 **Fig 2. Oocyst numbers in male and female mosquitoes injected with *Plasmodium berghei***

138 **ookinetes.** (A) Oocysts were counted at 14 d post injection of 2000 ookinetes in males (n =  
139 28) and females (n = 24). (B) Oocysts were counted at 14 d post injection of 5000 ookinetes  
140 in males (n = 34) and females (n = 30). Horizontal bars indicate median values.

141 Mann–Whitney test was used for comparison (\*  $p < 0.05$ , \*\*  $p < 0.01$ ). Data are expressed as  
142 the pooled results of three replicates.

143

## 144 **RNA-seq analysis of male and female mosquitoes**

145 To explore the genes that regulate *P. berghei* infection, we performed RNA-seq  
146 analysis of male and female mosquitoes at 24 h post injection, when ookinetes had  
147 differentiated into oocysts. More genes were differentially regulated in females than in males  
148 injected with 5 000 *P. berghei* ookinetes. In total, 140 genes were upregulated and 89 were  
149 downregulated in males, whereas 304 were upregulated and 167 were downregulated in  
150 females (fold change  $\geq|2|$ ) (Fig 3A).

151

152 **Fig 3. RNA-seq analysis of mosquitoes injected with *Plasmodium berghei* ookinetes. (A)**

153 Number of upregulated and downregulated genes in mosquitoes at 24 h post injection of 5000  
154 *P. berghei* ookinetes (fold change  $\geq |2|$ ). Up: upregulated gene, Down: downregulated gene.

155 (B) Percentage of variable genes annotated as biological process, cellular component,  
156 molecular function, or unknown function in gene ontology analysis. (C) Detailed functions of  
157 genes categorized as biological process.

158

159 Gene Ontology (GO) analysis showed there were 668 genes of known function and  
160 193 genes with unknown functions. In males, 29.78% were classified as biological processes,  
161 17.15% as cellular components, 25.56% as molecular functions, and 27.51% with unknown  
162 functions, whereas in females, the percentages were 30.74%, 21.43%, 24.90%, and 22.93%,  
163 respectively (Fig 3B). Among the biological processes, metabolic processes were the most  
164 common in both males and females, whereas immune system processes were observed at  
165 0.76% in males and 0.48% in females (Fig 3C). The top 20 upregulated and downregulated  
166 genes in males and females are shown in Table 1. Most have unknown functions in both  
167 sexes.

168

169 **Table 1. Genes with the most variable expression in male and female mosquitoes**  
 170 **injected with *Plasmodium berghei* ookinetes.**

| Male               |      |             |                        | Female     |      |             |             |
|--------------------|------|-------------|------------------------|------------|------|-------------|-------------|
| Gene ID            | Type | Fold change | Function               | Gene ID    | Type | Fold change | Function    |
| <b>Upregulated</b> |      |             |                        |            |      |             |             |
| ASTEI08011         | PC   | 840.051     | Unspecified            | ASTEI06560 | PC   | 56.734      | Unspecified |
| ASTEI05475         | PC   | 15.863      | Unspecified            | ASTEI01256 | PC   | 41.215      | Unspecified |
| ASTEI02008         | PC   | 12.868      | Unspecified            | ASTEI11350 | PC   | 40.660      | Unspecified |
| ASTEI07456         | PC   | 8.058       | Unspecified            | ASTEI05300 | PC   | 33.923      | Unspecified |
| ASTEI04711         | PC   | 7.873       | Unspecified            | ASTEI02744 | PC   | 28.089      | Unspecified |
| ASTEI10579         | PC   | 7.053       | Unspecified            | ASTEI01747 | PC   | 24.236      | Unspecified |
| ASTEI05300         | PC   | 6.884       | Unspecified            | ASTEI02745 | PC   | 20.332      | Unspecified |
| ASTEI11350         | PC   | 6.265       | Unspecified            | ASTEI02028 | PC   | 20.188      | Unspecified |
| ASTEI00942         | PC   | 6.252       | Insulin-like peptide 5 | ASTEI05302 | PC   | 17.607      | Unspecified |
| ASTEI06560         | PC   | 6.009       | Unspecified            | ASTEI10660 | PC   | 17.323      | Unspecified |
| ASTEI05299         | PC   | 5.973       | Unspecified            | ASTEI07614 | PC   | 13.962      | Unspecified |
| ASTEI00668         | PC   | 5.743       | Unspecified            | ASTEI01070 | PC   | 13.674      | Unspecified |
| ASTEI10541         | PC   | 5.615       | Unspecified            | ASTEI10165 | PC   | 12.857      | Unspecified |
| ASTEI10164         | PC   | 5.194       | Unspecified            | ASTEI05298 | PC   | 10.623      | Unspecified |
| ASTEI06287         | PC   | 5.152       | Transferrin            | ASTEI05299 | PC   | 10.281      | Unspecified |
| ASTEI08428         | PC   | 5.083       | Unspecified            | ASTEI04630 | PC   | 8.567       | Unspecified |
| ASTEI06585         | PC   | 5.079       | Unspecified            | ASTEI04764 | PC   | 8.551       | Unspecified |
| ASTEI02745         | PC   | 4.912       | Unspecified            | ASTEI02027 | PC   | 8.522       | Unspecified |



|                      |    |        |                                              |              |        |                                        |
|----------------------|----|--------|----------------------------------------------|--------------|--------|----------------------------------------|
| <b>ASTEI05683</b>    | PC | 4.908  | Unspecified                                  | ASTEI10751PC | 8.144  | Unspecified                            |
| <b>1</b>             |    |        |                                              |              |        |                                        |
| <b>ASTEI11561</b>    | PC | 4.720  | Unspecified                                  | ASTEI00445PC | 8.110  | Unspecified                            |
| <b>Downregulated</b> |    |        |                                              |              |        |                                        |
| <b>ASTEI10516</b>    | PC | -6.443 | Unspecified                                  | ASTEI08024PC | -6.875 | Unspecified                            |
| <b>ASTEI11598</b>    | PC | -5.533 | Unspecified                                  | ASTEI01867PC | -6.824 | Unspecified                            |
| <b>ASTEI07580</b>    | PC | -5.187 | Osiris 11                                    | ASTEI08168PC | -5.130 | Unspecified                            |
| <b>ASTEI08089</b>    | PC | -4.601 | Unspecified                                  | ASTEI12087SR | -4.499 | U2 spliceosomal<br>RNA                 |
| <b>ASTEI04108</b>    | PC | -4.359 | Unspecified                                  | ASTEI04832PC | -4.428 | Unspecified                            |
| <b>ASTEI11712</b>    | PC | -3.838 | Innexin                                      | ASTEI02029PC | -3.944 | Unspecified                            |
| <b>ASTEI07542</b>    | PC | -3.786 | Unspecified                                  | ASTEI01289PC | -3.725 | Unspecified                            |
|                      |    |        | FLYWCH-type                                  |              |        |                                        |
| <b>ASTEI06186</b>    | PC | -3.394 | domain-containing<br>protein                 | ASTEI01294PC | -3.716 | Unspecified                            |
| <b>ASTEI01075</b>    | PC | -3.232 | Unspecified                                  | ASTEI12263SR | -3.484 | U2 spliceosomal<br>RNA                 |
| <b>ASTEI06944</b>    | PC | -3.101 | Unspecified                                  | ASTEI10808PC | -3.300 | Histone H2A                            |
| <b>ASTEI10499</b>    | PC | -3.068 | Unspecified                                  | ASTEI10804PC | -3.253 | Histone H2A                            |
| <b>ASTEI11858</b>    | SR | -2.979 | U6 spliceosomal RNA                          | ASTEI01619PC | -3.249 | Unspecified                            |
| <b>ASTEI07844</b>    | PC | -2.884 | Unspecified                                  | ASTEI00798PC | -3.207 | Unspecified                            |
|                      |    |        | Phosphatidylserine                           |              |        |                                        |
| <b>ASTEI08071</b>    | PC | -2.865 | decarboxylase<br>proenzyme,<br>mitochondrial | ASTEI02104PC | -3.144 | Leucine rich immune<br>protein (Short) |

|            |    |        |             |            |    |        |                                   |
|------------|----|--------|-------------|------------|----|--------|-----------------------------------|
| ASTEI11218 | PC | -2.855 | Unspecified | ASTEI02414 | PC | -3.074 | Unspecified                       |
| ASTEI02041 | PC | -2.808 | Unspecified | ASTEI03548 | PC | -3.071 | Unspecified                       |
| ASTEI08776 | PC | -2.775 | Unspecified | ASTEI11477 | PC | -2.989 | Unspecified                       |
| ASTEI08651 | PC | -2.752 | Unspecified | ASTEI02978 | PC | -2.977 | Unspecified                       |
| ASTEI09420 | PC | -2.743 | Unspecified | ASTEI04415 | PC | -2.911 | Unspecified                       |
| ASTEI00613 | PC | -2.629 | Unspecified | ASTEI02025 | PC | -2.902 | Angiotensin-<br>converting enzyme |

---

171 The top 20 upregulated and downregulated genes in males and females are listed in order of

172 the magnitude of change. Genes with unknown function are marked as unspecified.

173 PC: Protein coding, SR: SnRNA

174

## 175 **Detection of *P. falciparum* in male mosquitoes injected with** 176 **gametocytes or zygotes**

177 Male mosquitoes were injected with *P. falciparum* gametocytes or zygotes, and  
178 parasitic DNA in mosquitoes was measured on different days after injection. *P. falciparum*  
179 DNA was detected by nested polymerase chain reaction (PCR) up to 15 d post injection  
180 (Table 2). For 20 stage-V gametocytes injected into males, the detection rate of *P. falciparum*  
181 was 100% on day 0 and 30% on day 15. As for the 2, 1, and 1 stage-V gametocytes, the  
182 detection rates were 100.0%, 50.0%, and 81.3%, respectively, on day 0, and 30%, 0%, and  
183 0%, respectively, on day 15. For 50 zygotes injected, the detection rate was 100% on days 0  
184 to 11. Eight PCR-positive samples were sequenced and confirmed to be the *P. falciparum*  
185 18S rRNA gene. In addition, the DNA content of *P. falciparum* in mosquitoes injected with  
186 20 stage-V gametocytes was higher on day 15 than on day 0 (S1 Fig).

187

188 **Table 2. Detection of *Plasmodium falciparum* in male mosquitoes injected with**  
 189 **gametocytes or zygotes using nested polymerase chain reaction (PCR).**

| Injected parasites<br>/mosquito | Positive rate of PCR [%]<br>(PCR-positive mosquitoes/total mosquitoes) |           |           |           |           |
|---------------------------------|------------------------------------------------------------------------|-----------|-----------|-----------|-----------|
|                                 | Days post injection                                                    |           |           |           |           |
|                                 | 0                                                                      | 1         | 11        | 12        | 15        |
| <b>20 gametocytes</b>           | 100 (12/12)                                                            | 100 (2/2) | ND        | ND        | 30 (3/10) |
| <b>2 gametocytes</b>            | 100 (6/6)                                                              | 0 (0/2)   | ND        | ND        | 30 (3/10) |
| <b>1 gametocyte</b>             | 50 (1/2)                                                               | 71 (5/7)  | ND        | ND        | 0 (0/2)   |
| <b>1 gametocyte</b>             | 81 (13/16)                                                             | 40 (4/10) | 0 (0/1)   | 10 (1/10) | 0 (0/17)  |
| <b>50 zygotes</b>               | 100 (13/13)                                                            | 100 (6/6) | 100 (1/1) | ND        | ND        |

190 Male mosquitoes were injected with the indicated number of parasites and at the indicated  
 191 days, some mosquitoes were homogenized and assayed by PCR for the presence of *P.*  
 192 *falciparum* 18S rRNA genes. Number of positive mosquitoes out of number analyzed is  
 193 presented in parentheses. ND: No data

194

## 195 Discussion

196 In this study, *P. berghei* oocysts formed throughout the body in male and female  
 197 mosquitoes injected with ookinetes, particularly in the esophagus, dorsal diverticula, crop,  
 198 and inner abdominal wall. In blood-feeding female mosquitoes, *P. berghei* ookinetes  
 199 transform into oocysts by migrating through midgut epithelial cells to face the hemocoel [2–  
 200 4]. It has been reported that *P. berghei* ookinetes injected into the female *A. gambiae*  
 201 hemocoel can develop into oocysts anywhere in the hemocoel [11,12], consistent with the  
 202 observations of this study. However, this study demonstrated that ookinetes can develop into

203 oocysts in both male and female *A. stephensi* after injection. Many parasites migrate to  
204 specific tissues [16]; ookinetes injected into the hemocoel did not exhibit tissue specificity,  
205 suggesting that they migrated and adhered randomly to an available surface.

206 Furthermore, sporozoites were formed throughout the body at 28 d post injection and  
207 infected mice after administration into their tail vein or via mosquito blood feeding.  
208 Mosquitoes have an open circulatory system, and hemolymph from the dorsal vessels  
209 promotes circulation throughout the hemocoel [17,18]. Sporozoites move passively in the  
210 hemocoel following the hemolymph flow, attach to the salivary glands, and migrate into the  
211 salivary cavity [19]. They can be found attached to various tissues when mosquitoes are  
212 infected by blood feeding [5]. Thus, it is likely that sporozoites were transported throughout  
213 the mosquito body following the hemolymph flow and invaded the salivary glands.

214 Male mosquitoes exhibited more *P. berghei* oocysts than females at every site. The  
215 number of total oocysts in males was significantly higher than that in females ( $p < 0.01$ –  
216  $0.05$ ), indicating that males exhibit greater competence than females. Moreover, injection of  
217 increased numbers of ookinetes did not increase the number of oocysts in both male and  
218 female mosquitoes. This suggests that a mosquito has a limited capacity to form an oocyst, or  
219 parasites can increase only up to a certain number; these results require further analysis. We  
220 attempted to investigate competence factors at the early oocyst stage using RNA-seq analysis  
221 at 24 h post injection. There were more gene expression changes in female than in male  
222 mosquitoes, those annotated to metabolic processes being the most common. Possibly, these  
223 genes participate in blocking early oocyst formation. Most up and downregulated genes in  
224 males and females have unknown functions, and differences in competence between males  
225 and females may be owing to these unknown-function genes. Vector competence in  
226 mosquitoes has been reported to be associated with many biological and environmental  
227 factors, such as physiological function, nutritional status, gut microbiota, and immune

228 response [2,9]. Previous reports have compared strains or species of *Anopheles* mosquitoes  
229 with varying competence for *Plasmodium* parasites, indicating the involvement of the  
230 immune system and other factors [20–23]. However, in these studies, it was difficult to  
231 equalize genetic backgrounds and growth environments of mosquitoes, exclude these factors,  
232 and compare the competence factors. Therefore, the detailed molecular mechanisms that  
233 define vector competence remain unclear. As male and female mosquitoes of the same  
234 species and strain (e.g., *A. stephensi* [STE2 strain, MRA-128]), have the same genetic  
235 background and growth environment, a detailed examination of the genes revealed by the  
236 comparison of males and females in this study could unveil new facts concerning the  
237 molecular mechanisms of competence.

238         This study showed that *P. falciparum* infects male mosquitoes injected with  
239 gametocytes and zygotes, indicating that the development of gametocytes to ookinetes, which  
240 normally occurs in the midgut, is midgut-independent and occurs in the hemocoel. In blood-  
241 feeding mosquitoes, gametocytes differentiate into mature oocysts with sporozoites in 10–15  
242 d [2–4]. The injection of *P. falciparum* gametocytes and zygotes showed infection at 15- and  
243 11-d post injection, respectively. In addition, the quantity of *P. falciparum* DNA was greater  
244 on day 15 than on day 0 of gametocyte injection. There were differences among individuals,  
245 suggesting that mature oocysts with sporozoites formed in male mosquitoes. To confirm the  
246 development of a *P. falciparum* gametocyte, it is necessary to observe ookinetes, oocysts, and  
247 sporozoites in the injected mosquitoes. Currently, sporozoite vaccines to prevent the spread  
248 of *Plasmodium* parasites are being developed; however only one type of vaccine is currently  
249 in use, and more research on oocysts, which produce sporozoites internally, and sporozoites,  
250 which are infectious to humans and develop inside mosquitoes, is required to enable effective  
251 vaccine development [24,25]. A method for the *in vitro* culture of *P. falciparum* oocysts and  
252 sporozoites has been reported [26,27]; however, it is complicated and cumbersome, and the

253 number of oocysts and sporozoites obtained is low. Injection of gametocytes into male  
254 mosquitoes may be a simpler way to develop oocysts and sporozoites, and as male  
255 mosquitoes are used, there is no risk of infection by blood feeding. This is expected to  
256 advance the study of the mosquito stages of these parasites.

257

## 258 **Conclusion**

259 This study reveals that *P. berghei* ookinete injections into male and female  
260 mosquitoes, result in males having a higher competence than females. The differentially  
261 regulated genes in these males and females provide insight into the underlying molecular  
262 mechanisms involved in vector competence. In addition, *P. falciparum* infection succeeded in  
263 males when injected with gametocytes and zygotes. Hence, this study helps elucidate the  
264 factors involved in vector competence and access the mosquito stages of parasites more  
265 safely.

266

## 267 **Materials and Methods**

### 268 **Mosquito rearing and microinjection of parasites**

269 STE2 strain *A. stephensi* mosquitoes were reared in an insectary at 19 °C under a  
270 14:10 h light:dark cycle with 10% (w/v) sucrose solution. A total of 69 nL of purified  
271 ookinete, gametocyte, and zygote suspensions was injected into the hemocoel of <10-day-old  
272 male and female mosquitoes using a Nanoject II automatic nanoliter injector (Drummond  
273 Scientific Company, Broomall, PA, USA) [11].

274

### 275 ***P. berghei* and ookinete culture**

276 *P. berghei* (ANKA strain) that constitutively expresses green fluorescent protein  
277 (GFP) was maintained via serial passage in ICR mice (Charles River Laboratories Japan Inc.,  
278 Yokohama, Japan) from frozen stock. Ookinete culture of *P. berghei* was performed as  
279 previously described [28,29]. Blood from infected mice was collected via cardiac puncture  
280 and placed in 10 volumes of ookinete medium containing RPMI medium 1640 (Thermo  
281 Fisher Scientific Inc., Waltham, MA, USA), 25 mM HEPES (Dojindo Laboratories,  
282 Kumamoto, Japan), 0.4 mM hypoxanthine (Sigma-Aldrich, St. Louis, MO, USA), 24 mM  
283 NaHCO<sub>3</sub> (Fujifilm Wako Pure Chemical Corporation, Osaka, Japan), and 12.5 mg L<sup>-1</sup>  
284 gentamicin reagent solution (Gibco) before incubation for 24 h at 19 °C.

285

## 286 ***P. falciparum* and culture of gametocytes and zygotes**

287 *In vitro* culture of *P. falciparum* (3D7 strain) was performed according to the standard  
288 protocol [30] and maintained at 5% hematocrit in A<sup>+</sup> human red blood cells (RBCs) on a  
289 complete medium at 37 °C under 5% CO<sub>2</sub> and 5% O<sub>2</sub>. The complete medium comprised  
290 RPMI medium 1640, 25 mM HEPES, 0.1 mM hypoxanthine, 24–26 mM NaHCO<sub>3</sub>, 11 mM  
291 D(+)-glucose (Fujifilm Wako Pure Chemical Corporation), 12.5 mg L<sup>-1</sup> gentamicin reagent  
292 solution, and 10% (v/v) heat-inactivated type A<sup>+</sup> human plasma (Japan Red Cross Society,  
293 Tokyo, Japan). Gametocyte cultures were initiated from asexual parasites at 0.5–3.9%  
294 parasitemia and 6–10% hematocrit. The cultures were maintained for 14–27 d with daily  
295 medium changes without adding fresh RBCs. From day 1 to 5, the culture medium was  
296 supplemented with N-acetyl-D-glucosamine (Sigma-Aldrich) at a final concentration of 50  
297 nM. Mature gametocytes were resuspended at 20% hematocrit in an exflagellation-inducing  
298 medium containing 10 mM Tris (pH 7.6, Fujifilm Wako Pure Chemical Corporation), 170  
299 mM NaCl (Fujifilm Wako Pure Chemical Corporation), 25 mM NaHCO<sub>3</sub>, 10 mM D(+)-

300 glucose, and 50–100  $\mu$ M xanthurenic acid (Sigma-Aldrich) at 19 °C for 30 min for gamete  
301 maturation and zygote fertilization.

302

## 303 **Purification of parasites**

304 *P. berghei* ookinetes and *P. falciparum* gametocytes and zygotes were purified using  
305 a MidiMACS separator system (LS Columns, Miltenyi Biotec, Bergisch Gladbach,  
306 Germany), as previously described [28,29]. Ookinetes, gametocytes, and zygotes were  
307 recovered by passing ookinete medium, incomplete medium comprising complete medium  
308 without 10% (v/v) heat-inactivated type A<sup>+</sup> human plasma, and exflagellation-inducing  
309 medium, respectively.

310

## 311 **Examination of mosquitoes injected with *P. berghei***

312 Male and female mosquitoes were dissected at 14 d post injection, and oocyst  
313 localization, number, and prevalence were examined using an Eclipse E600 (Nikon, Tokyo,  
314 Japan) fluorescence microscope. At 28 d post injection, sporozoite localization was observed  
315 using a fluorescence microscope. Sporozoites from whole bodies or salivary glands of the  
316 injected males and females were administered into the tail vein of mice. Seven injected  
317 females were blood-fed on mice, and the infection in the mice was checked every day using a  
318 blood smear test.

319

## 320 **DNA extraction**

321 Mosquitoes with *P. falciparum* gametocytes or zygotes from 0 to 15 d post injection  
322 were collected and stored at –80 °C. Whole mosquitoes were homogenized using a Micro  
323 Smash™ MS-100R (Tomy Seiko Co., Ltd., Tokyo, Japan) at 2500 rpm for 30 s. DNA was



324 extracted using a ZymoBIOMICS Miniprep (Zymo Research Corporation, Irvine, CA, USA)  
325 according to the manufacturer's protocol or using the phenol-chloroform isoamyl alcohol  
326 method. Briefly, a 500  $\mu$ L genomic lysis buffer (Zymo Research Corporation) and 500  $\mu$ L of  
327 phenol:chloroform:isoamyl alcohol (25:24:1) (Nippon Gene Co., Ltd., Tokyo, Japan) were  
328 added to extract the DNA, and then the DNA was precipitated using ethanol. The extracted  
329 DNA was dissolved with 10–50  $\mu$ L of TE buffer and stored at -20 °C.

330

### 331 **Detection of *P. falciparum* using nested PCR**

332 Prime STAR<sup>®</sup> HS (Premix) (Takara Bio Inc., Shiga, Japan) was used for PCR  
333 amplification, according to the manufacturer's protocol, and the extracted DNA samples were  
334 used as template DNA. For *A. stephensi* S7 gene (loading control) amplification, PCR was  
335 conducted using primers AsRpS7-F (5'-CCTGGATAAGAACCAGCAGA-3') and AsRpS7-R  
336 (5'-GGCCAGTCAGCTTCTTGTA-3'). The PCR conditions were as follows: 1 cycle of 95  
337 °C for 3 min, followed by 35 cycles of 98 °C for 10 s, 55 °C for 5 s, and 72 °C for 18 s, and 1  
338 cycle of 72 °C for 6 min. Distilled water as a negative control. Amplification of the *P.*  
339 *falciparum* 18S rRNA gene for detecting *P. falciparum* was conducted using nested PCR.  
340 The primers for the first PCR reaction were 18S rRNA-1F (5'-  
341 TTAATTTGACTCAACACGGGG-3') and 18S rRNA-1R (5'-  
342 TATTGATAAAGATTACCTA-3') [13]. The PCR conditions were as follows: 1 cycle of 95  
343 °C for 3 min, followed by 40 cycles of 98 °C for 10 s, 55 °C for 15 s, and 72 °C for 33 s, and  
344 1 cycle of 72 °C for 6 min. The primers for the second reaction were 18S rRNA-2F (5'-  
345 TAATAGCTCTTTCTTGAT-3') and 18S rRNA-1R. The PCR conditions were as follows: 1  
346 cycle of 95 °C for 3 min, followed by 35 cycles of 98 °C for 10 s, 55 °C for 15 s, and 72 °C  
347 for 30 s, and then 1 cycle of 72 °C for 6 min. Genomic DNA from *in vitro*-cultured *P.*

348 *falciparum* was used as a positive control and the 7–11-d-old male mosquitoes as a negative  
349 control. Eight PCR-positive samples were sequenced using 18S rRNA-2F and 18S rRNA-1R  
350 primers (Fasmac Co., Ltd., Kanagawa, Japan).

351

## 352 **Real-time PCR**

353 Among the PCR-positive mosquitoes injected with 20 stage-V gametocytes, DNA  
354 was quantified in three mosquitoes at 0 and 15 d post injection using KOD SYBR qPCR Mix  
355 (Toyobo Co., Ltd., Osaka, Japan), and 18S rRNA-3F (5'-GGATGGTGATGCATGGCCG-3')  
356 and 18S rRNA-2R (5'-CAGTGTAGCACGCGTGCAG-3') primers. The analysis was  
357 conducted using Applied Biosystems StepOnePlus (Thermo Fisher Scientific) with the  
358 following cycling conditions: 1 cycle at 98 °C for 3 min, followed by 40 cycles of 98 °C for  
359 10 s, 60 °C for 10 s, and 68 °C for 30 s, and 1 cycle of 95 °C for 15 s, 60 °C for 1 min, and 99  
360 °C for 15 s. *P. falciparum* DNA was quantified using a calibration curve, and each value was  
361 corrected by dividing by the quantity of template DNA used in the PCR reaction.

362

## 363 **RNA-seq analysis**

364 Male and female mosquitoes at 24 h post injection with *P. berghei* ookinetes or with  
365 ookinete medium (negative control) were collected for RNA-seq analysis. Three mosquitoes  
366 were collected as one sample and stored at -80 °C. Total RNA was extracted using Nucleo  
367 Spin RNA Blood (Macherey-Nagel, Düren, Germany) according to the manufacturer's  
368 protocol, delivered to MacroGen Japan Corp. (Tokyo, Japan) for library construction using  
369 the TruSeq Stranded mRNA LT Sample Prep Kit (Illumina, San Diego, CA, USA), and  
370 sequenced using the NovaSeq 6000 system (Illumina). FastQCv0.11.7  
371 (<http://www.bioinformatics.babraham.ac.uk/projects/fastqc/>) was used to analyze the raw

372 read quality, and statistical analysis was performed using fold change per comparison pair of  
373 mosquitoes injected with *P. berghei* ookinetes and with ookinete medium. GO analysis was  
374 performed using VectorBase (<https://www.vectorbase.org/>).

375

## 376 **Statistical analysis**

377 All statistical analyses were performed using GraphPad Prism version 8.4.3 software  
378 (GraphPad Software Inc., San Diego, CA, USA). We determined the significance of oocyst  
379 intensity in injected mosquitoes using the Mann–Whitney test ( $p < 0.01$ – $0.05$ ) and the  
380 significance of DNA content for real-time PCR using the unpaired t-test ( $p < 0.05$ ).

381

## 382 **Acknowledgments**

383 The *Plasmodium falciparum* used in this study was kindly provided by Dr. Marcelo  
384 Jacobs-Lorena, John Hopkins University, MD, USA. The green fluorescent protein-  
385 expressing *Plasmodium berghei* ANKA strain was provided by Dr. Yuda, Mie University,  
386 Japan. The *Anopheles stephensi* (STE2 strain, MRA-128) was provided by BEI Resources.  
387 We are grateful to the Japanese Red Cross Society for providing the human A-type blood and  
388 A-type serum. We thank Dr. Marcelo Jacobs-Lorena for engaging in constructive discussions  
389 with us on particular aspects of this study. In addition, this study would not have been  
390 possible without the assistance of our laboratory support staff member Mai Tanaka. Finally,  
391 we would like to thank Editage ([www.editage.com](http://www.editage.com)) for English language editing.

## 392   **References**

- 393       1. World Health Organization. World Malaria Report 2020. 2020 [Cited 2022 January  
394       13]. Available from: [https://www.who.int/teams/global-malaria-](https://www.who.int/teams/global-malaria-programme/reports/world-malaria-report-2020/)  
395       programme/reports/world-malaria-report-2020/
- 396       2. Shaw WR, Catteruccia F. Vector biology meets disease control: using basic research  
397       to fight vector-borne diseases. *Nat Microbiol.* 2019;4: 20–34. doi: 10.1038/s41564-  
398       018-0214-7.
- 399       3. Smith RC, Vega-Rodríguez J, Jacobs-Lorena M. The *Plasmodium* bottleneck: malaria  
400       parasite losses in the mosquito vector. *Mem Inst Oswaldo Cruz.* 2014;109: 644–661.  
401       doi: 10.1590/0074-0276130597.
- 402       4. Singh M, Suryanshu, Kanika, Singh G, Dubey A, Chaitanya RK. *Plasmodium*'s  
403       journey through the *Anopheles* mosquito: A comprehensive review. *Biochimie.*  
404       2021;181: 176–190. doi: 10.1016/j.biochi.2020.12.009.
- 405       5. Hajkazemian M, Bossé C, Mozūraitis R, Emami SN. Battleground midgut: The cost  
406       to the mosquito for hosting the malaria parasite. *Biol Cell.* 2021;113: 79–94. doi:  
407       10.1111/boc.202000039.
- 408       6. Graumans W, Jacobs E, Bousema T, Sinnis P. When is a *Plasmodium*-infected  
409       mosquito an infectious mosquito? *Trends Parasitol.* 2020;36: 705–716. doi:  
410       10.1016/j.pt.2020.05.011.
- 411       7. Sasaki M, Fujii Y, Iwamoto M, Ikadai H. Effect of sex steroids on *Babesia microti*  
412       infection in mice. *Am J Trop Med Hyg.* 2013;88: 367–375. doi:  
413       10.4269/ajtmh.2012.12-0338.
- 414       8. Kamis AB, Ibrahim JB. Effects of testosterone on blood leukocytes in *Plasmodium*  
415       *berghei*-infected mice. *Parasitol Res.* 1989;75: 611–613. doi: 10.1007/BF00930957.

- 416 9. Agarwal A, Parida M, Dash PK. Impact of transmission cycles and vector  
417 competence on global expansion and emergence of arboviruses. *Rev Med Virol.*  
418 2017;27: e1941. doi: 10.1002/rmv.1941
- 419 10. Dyer NA, Rose C, Ejeh NO, Acosta-Serrano A. Flying tsetse: survival and maturation  
420 of trypanosomes in tsetse flies. *Trends Parasitol.* 2013;29: 188–196. doi:  
421 10.1016/j.pt.2013.02.003.
- 422 11. Nacer A, Underhill A, Hurd H. The microneme proteins CTRP and SOAP are not  
423 essential for *Plasmodium berghei* ookinete to oocyst transformation in vitro in a cell  
424 free system. *Malar J.* 2008;7: 82. doi: 10.1186/1475-2875-7-82.
- 425 12. Paskewitz SM, Shi L. Bypassing the midgut results in development of *Plasmodium*  
426 *berghei* oocysts in a refractory strain of *Anopheles gambiae* (Diptera: Culicidae). *J*  
427 *Med Entomol.* 2005;42: 712–715. doi: 10.1093/jmedent/42.4.712.
- 428 13. Schneider D, Shahabuddin M. Malaria parasite development in a *Drosophila* model.  
429 *Science.* 2000;288: 2376–2379. doi: 10.1126/science.288.5475.2376.
- 430 14. Wang M, Wang J. Glucose transporter GLUT1 influences *Plasmodium berghei*  
431 infection in *Anopheles stephensi*. *Parasit Vectors.* 2020;13: 285. doi: 10.1186/s13071-  
432 020-04155-6.
- 433 15. Zeeshan M, Shilliday F, Liu T, Abel S, Mourier T, Ferguson DJP, et al. *Plasmodium*  
434 kinesin-8X associates with mitotic spindles and is essential for oocyst development  
435 during parasite proliferation and transmission. Gubbels M-J, editor. *PLoS Pathog.*  
436 2019;15: e1008048. doi: 10.1371/journal.ppat.1008048.
- 437 16. Silva Pereira S, Trindade S, De Niz M, Figueiredo LM. Tissue tropism in parasitic  
438 diseases. *Open Biol.* 2019;9: 190036. doi: 10.1098/rsob.190036.
- 439 17. Boppana S, Hillyer JF. Hemolymph circulation in insect sensory appendages:  
440 Functional mechanics of antennal accessory pulsatile organs (auxiliary hearts) in the

- 441 mosquito *Anopheles gambiae*. J Exp Biol. 2014;217: 3006–3014. doi:  
442 10.1242/jeb.106708.
- 443 18. Glenn JD, King JG, Hillyer JF. Structural mechanics of the mosquito heart and its  
444 function in bidirectional hemolymph transport. J Exp Biol. 2010;213: 541–550. doi:  
445 10.1242/jeb.035014.
- 446 19. Douglas RG, Amino R, Sinnis P, Frischknecht F. Active migration and passive  
447 transport of malaria parasites. Trends Parasitol. 2015;31: 357–362. doi:  
448 10.1016/j.pt.2015.04.010.
- 449 20. Collins FH, Sakai RK, Vernick KD, Paskewitz S, Seeley DC, Miller LH, et al.  
450 Genetic selection of a *Plasmodium*-refractory strain of the malaria vector *Anopheles*  
451 *gambiae*. Science. 1986;234: 607–610. doi: 10.1126/science.3532325.
- 452 21. Shinzawa N, Ishino T, Tachibana M, Tsuboi T, Torii M. Phenotypic dissection of a  
453 *Plasmodium*-refractory strain of malaria vector *Anopheles stephensi*: The reduced  
454 susceptibility to *P. berghei* and *P. yoelii*. Schneider BS, editor. PLoS One. 2013;8:  
455 e63753. doi: 10.1371/journal.pone.0063753.
- 456 22. Habtewold T, Povelones M, Blagborough AM, Christophides GK. Transmission  
457 blocking immunity in the malaria non-vector mosquito *Anopheles quadriannulatus*  
458 species A. PLoS Pathog. 2008;4: e1000070. doi: 10.1371/journal.ppat.1000070
- 459 23. Alavi Y, Arai M, Mendoza J, Tufet-Bayona M, Sinha R, Fowler K, et al. The  
460 dynamics of interactions between *Plasmodium* and the mosquito: a study of the  
461 infectivity of *Plasmodium berghei* and *Plasmodium gallinaceum*, and their  
462 transmission by *Anopheles stephensi*, *Anopheles gambiae*, and *Aedes aegypti*. Int J  
463 Parasitol. 2003;33: 933–943. doi: 10.1016/S0020-7519(03)00112-7

- 464 24. Mwakingwe-Omari A, Healy SA, Lane J, Cook DM, Kalhori S, Wyatt C, et al. Two  
465 chemoattenuated PfSPZ malaria vaccines induce sterile hepatic immunity. *Nature*.  
466 2021;595: 289–294. doi: 10.1038/s41586-021-03684-z.
- 467 25. Richie TL, Billingsley PF, Sim BKL, James ER, Chakravarty S, Epstein JE, et al.  
468 Progress with *Plasmodium falciparum* sporozoite (PfSPZ)-based malaria vaccines.  
469 *Vaccine*. 2015;33: 7452–7461. doi: 10.1016/j.vaccine.2015.09.096.
- 470 26. Itsara LS, Zhou Y, Do J, Dungel S, Fishbaugher ME, Betz WW, et al. PfCap380 as a  
471 marker for *Plasmodium falciparum* oocyst development in vivo and in vitro. *Malar J*.  
472 2018;17: 135. doi: 10.1186/s12936-018-2277-6.
- 473 27. Warburg A, Schneider I. In vitro culture of the mosquito stages of *Plasmodium*  
474 *falciparum*. *Exp Parasitol*. 1993;76: 121–126. doi: 10.1006/expr.1993.1014.
- 475 28. Nakayama K, Kimura Y, Kitahara Y, Soga A, Haraguchi A, Hakoziaki J, et al. Role of  
476 *Plasmodium berghei* ookinete surface and oocyst capsule protein, a novel oocyst  
477 capsule-associated protein, in ookinete motility. In Review; 2021 Mar. doi:  
478 10.21203/rs.3.rs-326425/v1.
- 479 29. Carter V, Cable HC, Underhill BA, Williams J, Hurd H. Isolation of *Plasmodium*  
480 *berghei* ookinetes in culture using Nycodenz density gradient columns and magnetic  
481 isolation. *Malar J*. 2003;2: 35. doi: 10.1186/1475-2875-2-35.
- 482 30. Moll K, Kaneko A, Sherf A, Wahlgren M. *Methods in malaria research*. Glasgow,  
483 UK: EVIMalaR; 2013.

484

## 485 **Supporting Information**

486 **S1 Fig. *Plasmodium falciparum* DNA content in male mosquitoes injected with**  
487 **gametocytes.** One mosquito injected with 20 stage-V gametocytes was used in this  
488 experiment. The mean DNA content on day 0 post injection was set as 1.0, and that on day 15

489 post injection was 7.3. Unpaired t-test was used for comparison ( $p < 0.05$ ). Data are from  
490 three biological replicates.

491

492 **S1 Table. Days confirming infection by administration of sporozoite of male and female-**

493 **injected mosquito.** At 28 d post injection, 2000–10000 *P. berghei* sporozoites from whole

494 bodies or salivary glands of the injected males and females, respectively, were administered

495 into the tail vein of mice. Seven injected females were blood-fed on mice, and the infection in

496 the mice was checked every day using a blood smear test. I.V.: administration into the tail

497 vein.



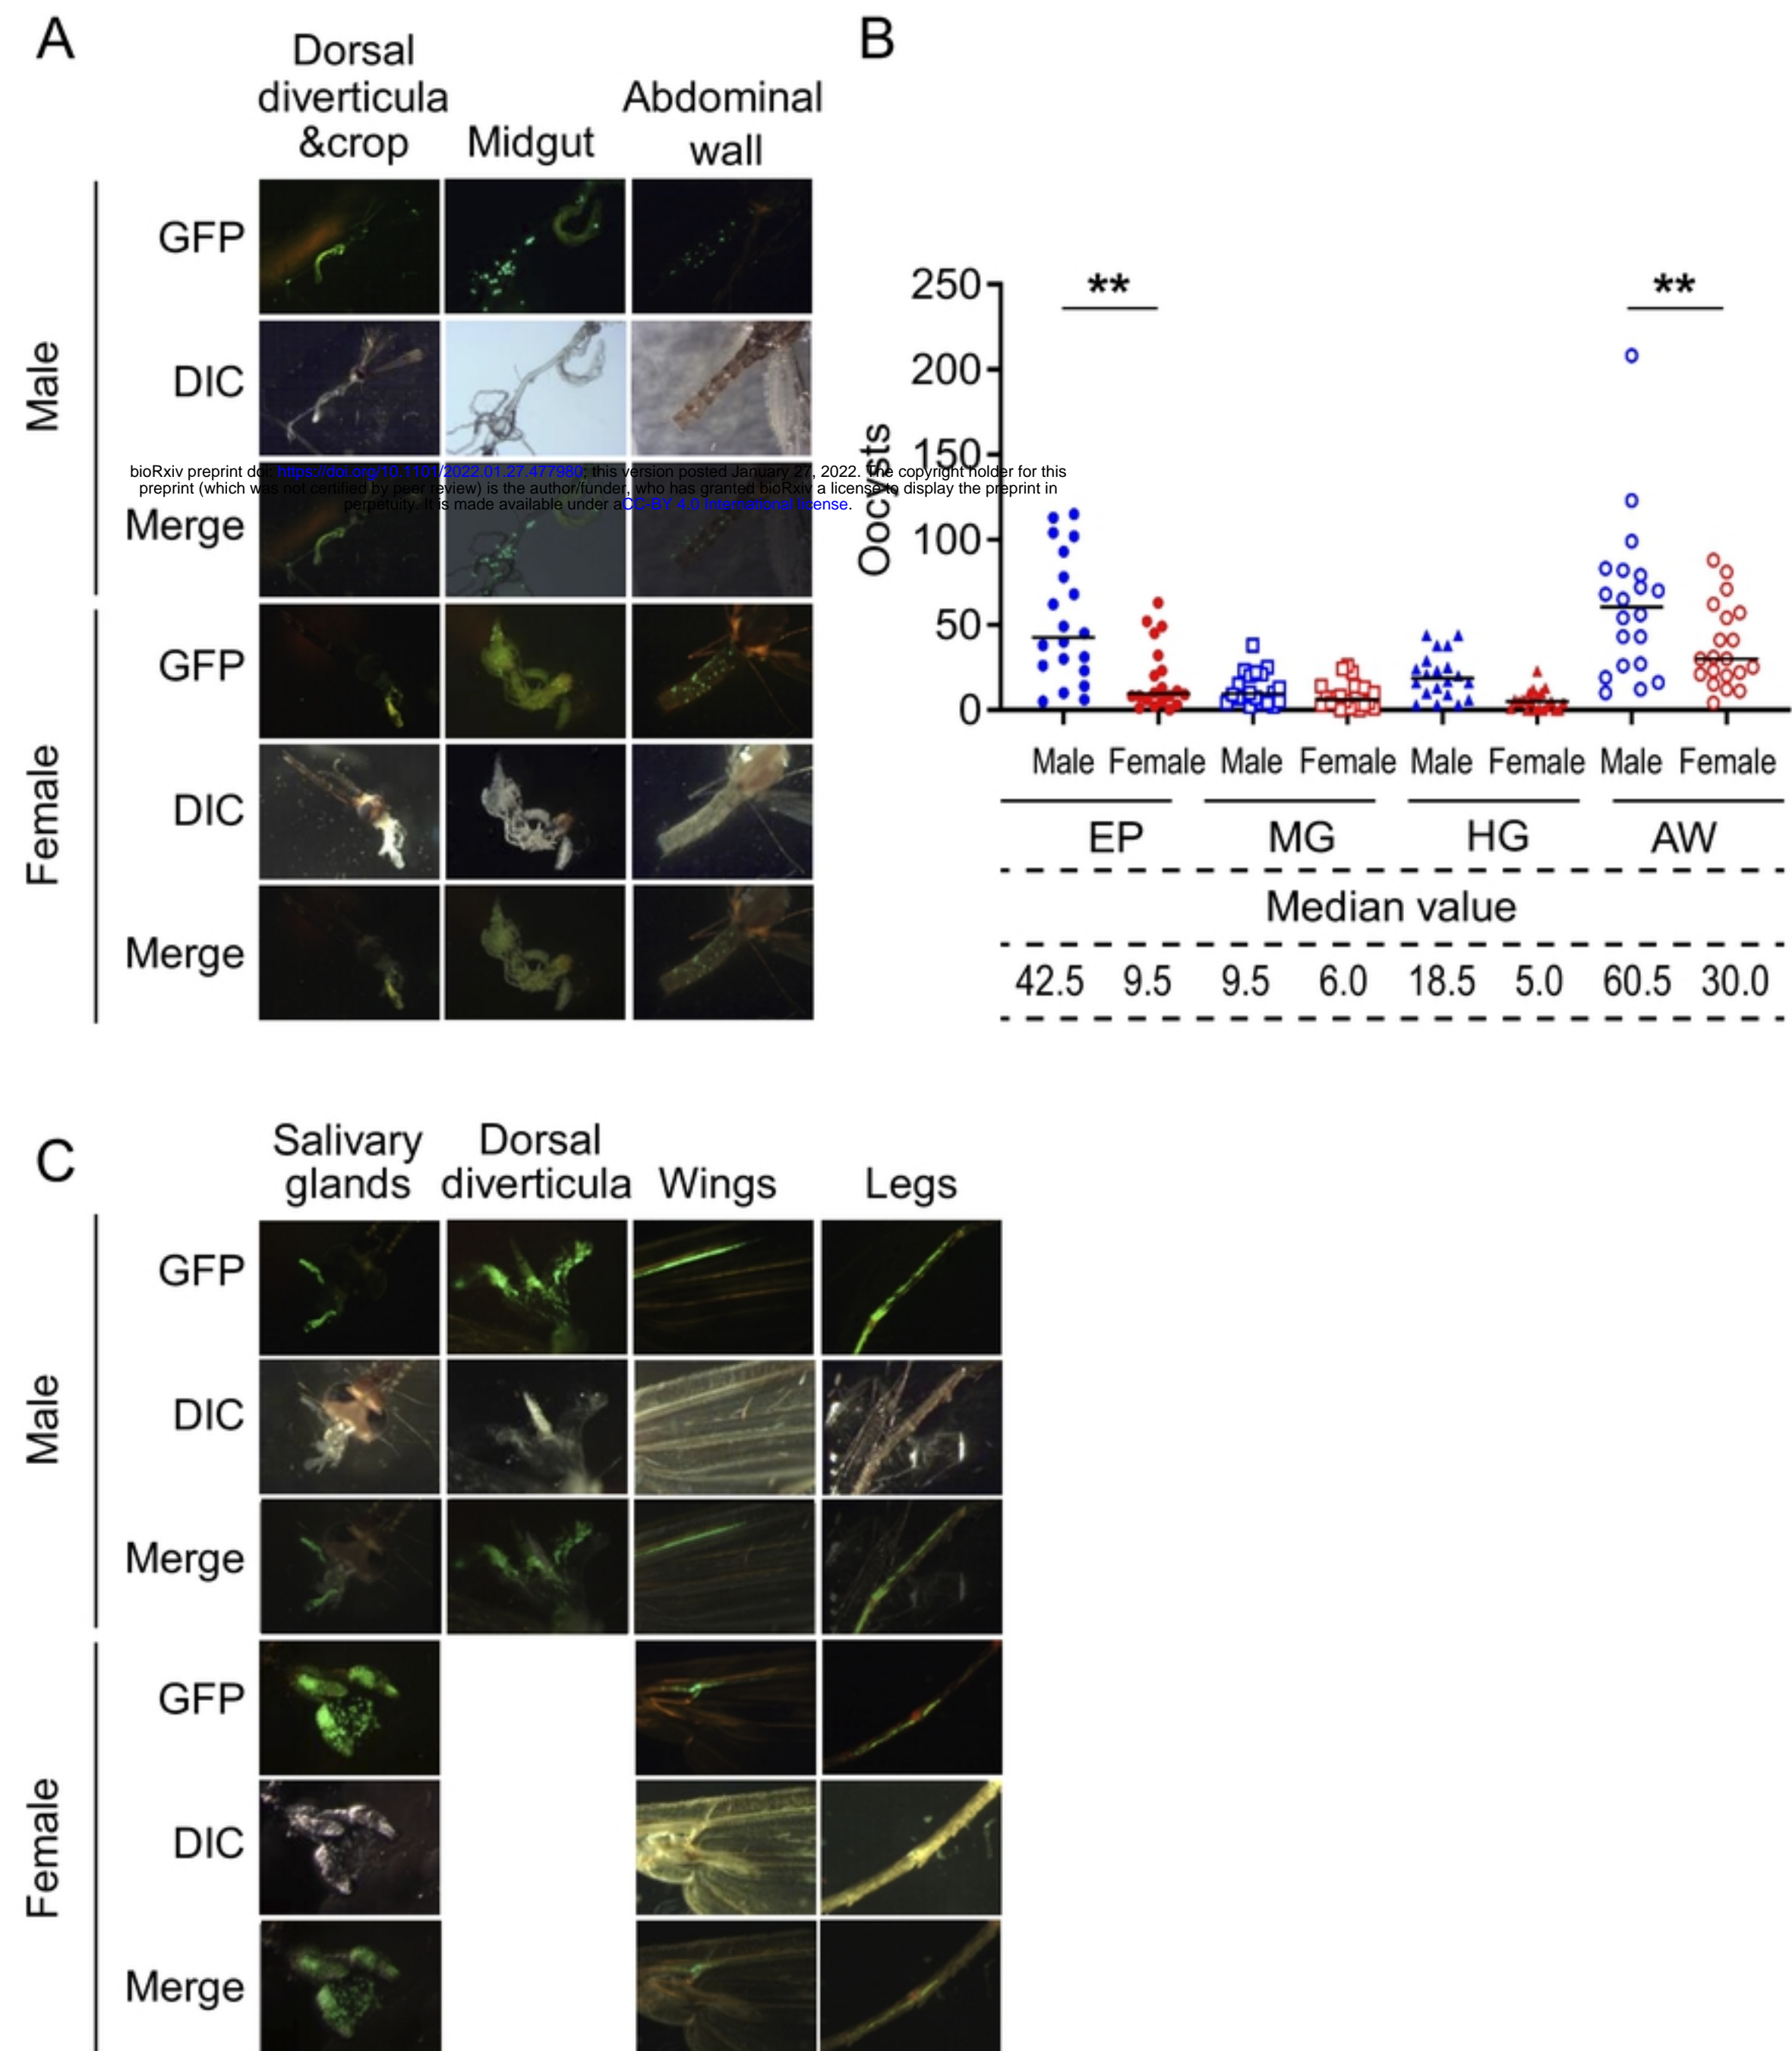

Figure 1

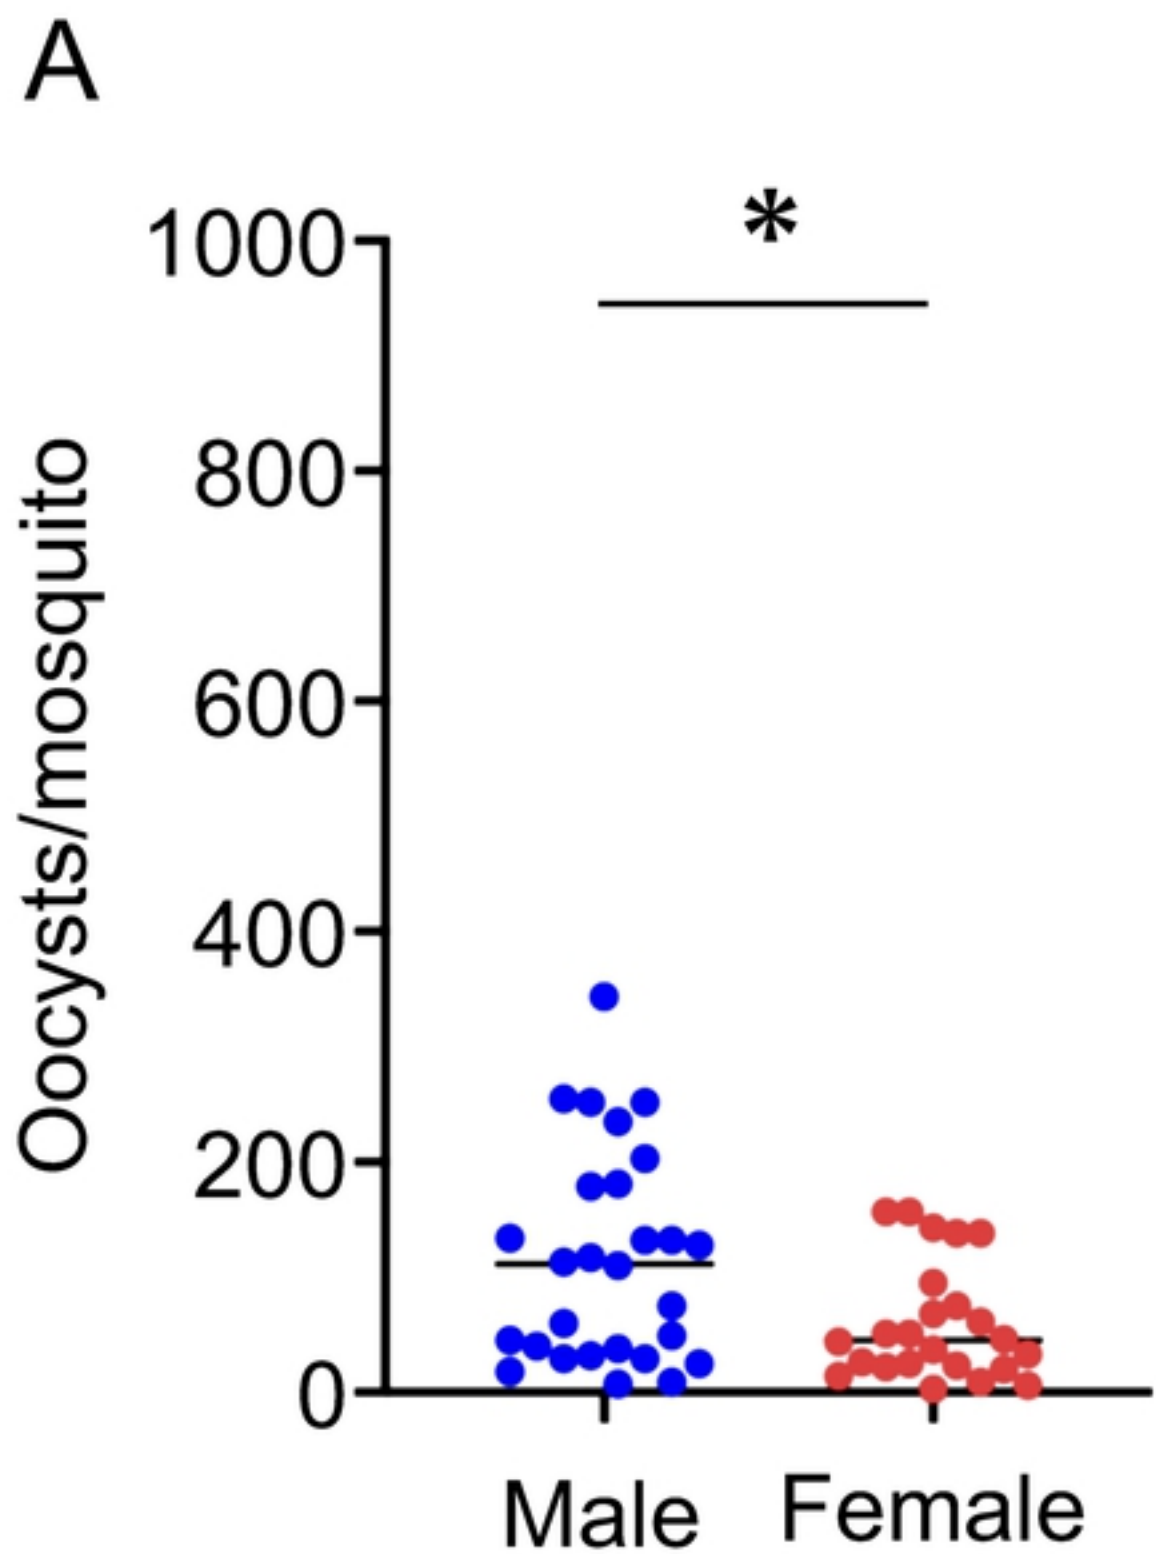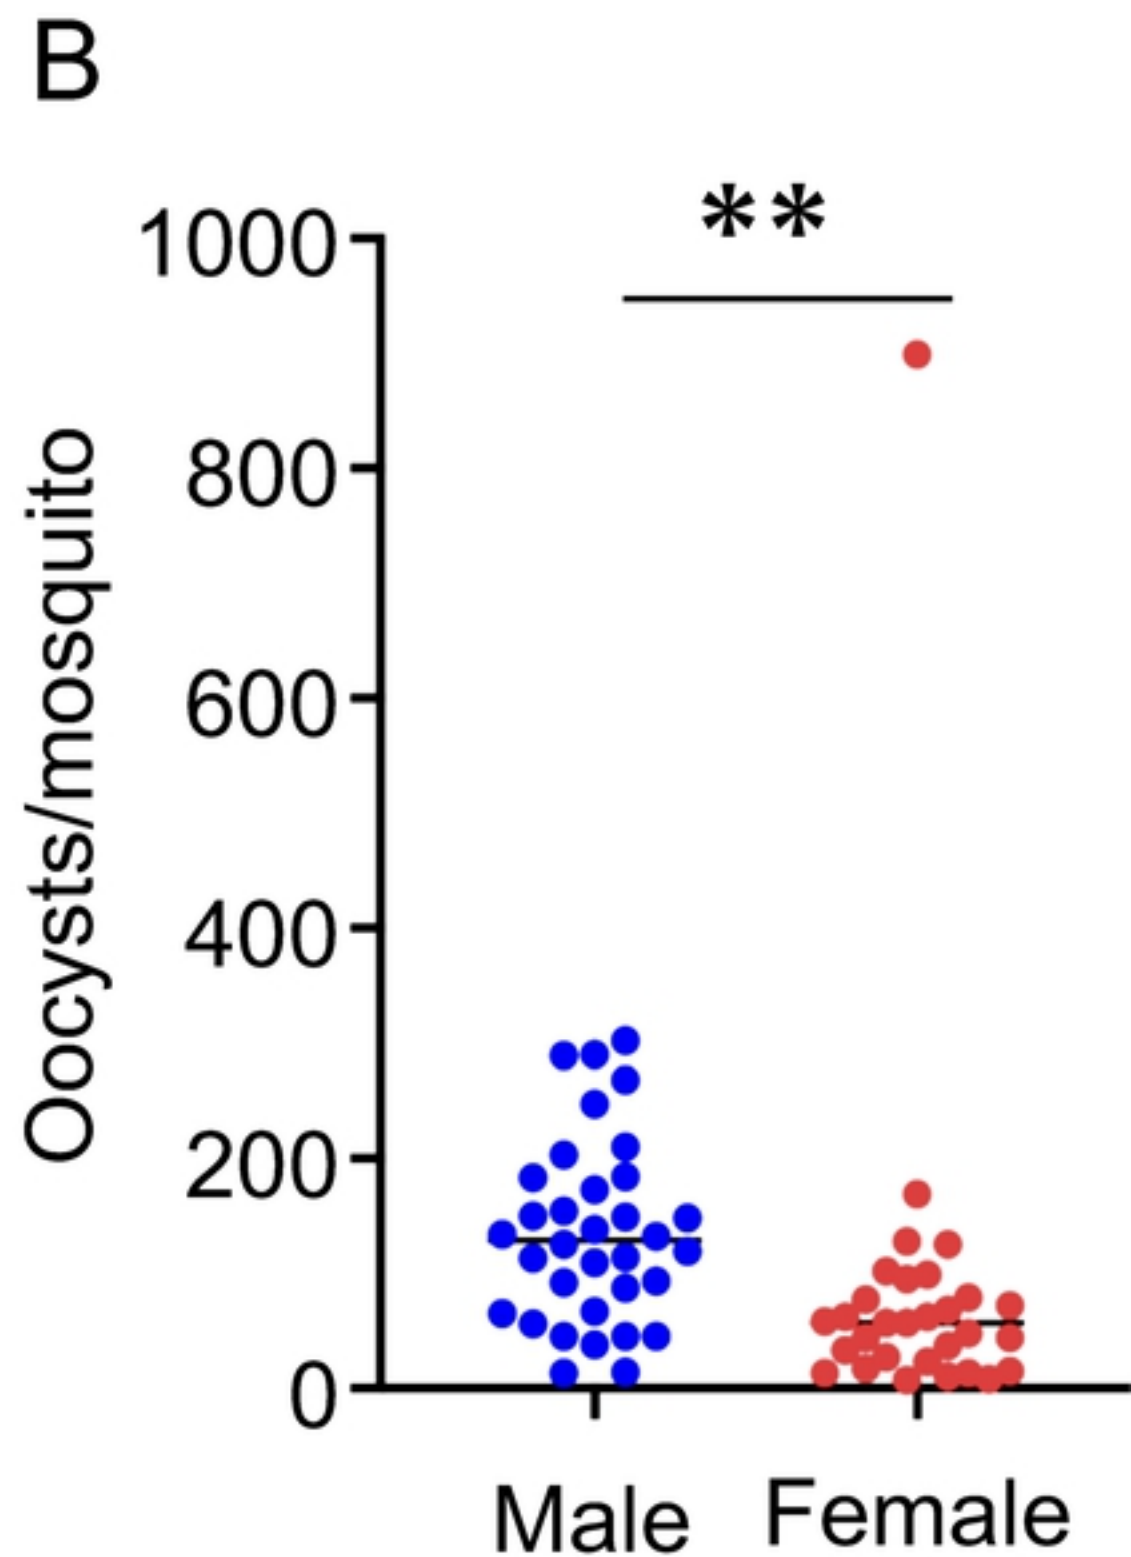

Figure 2

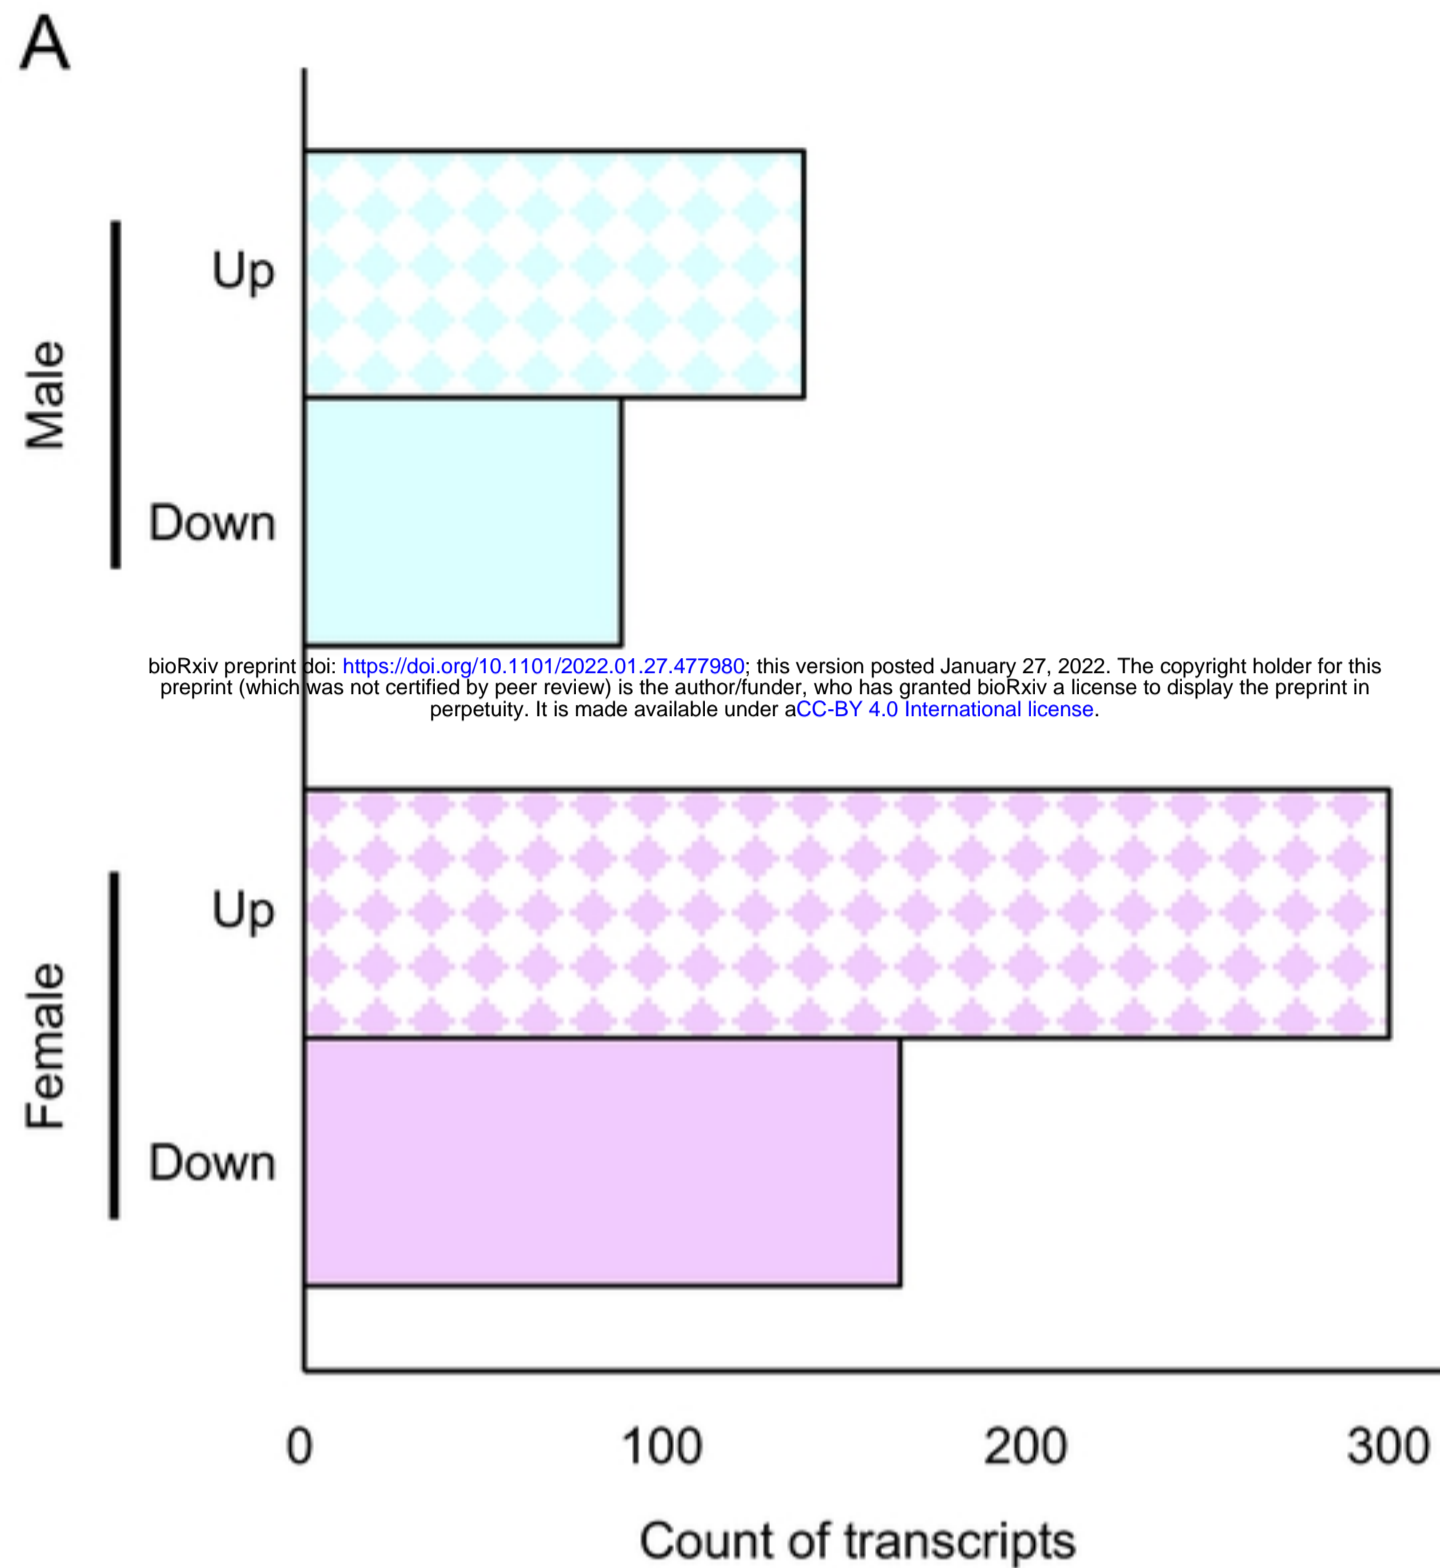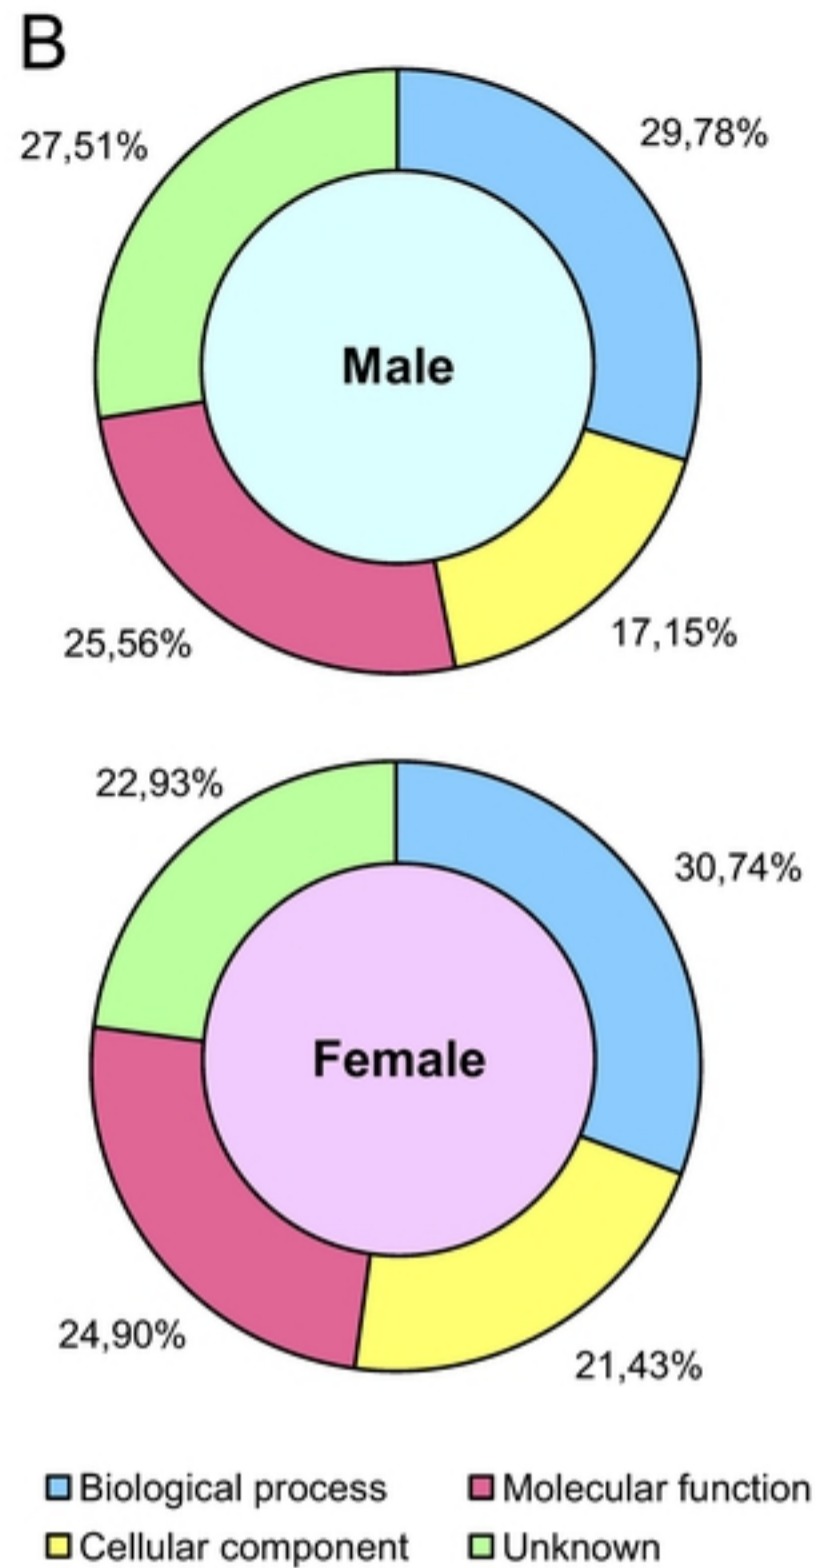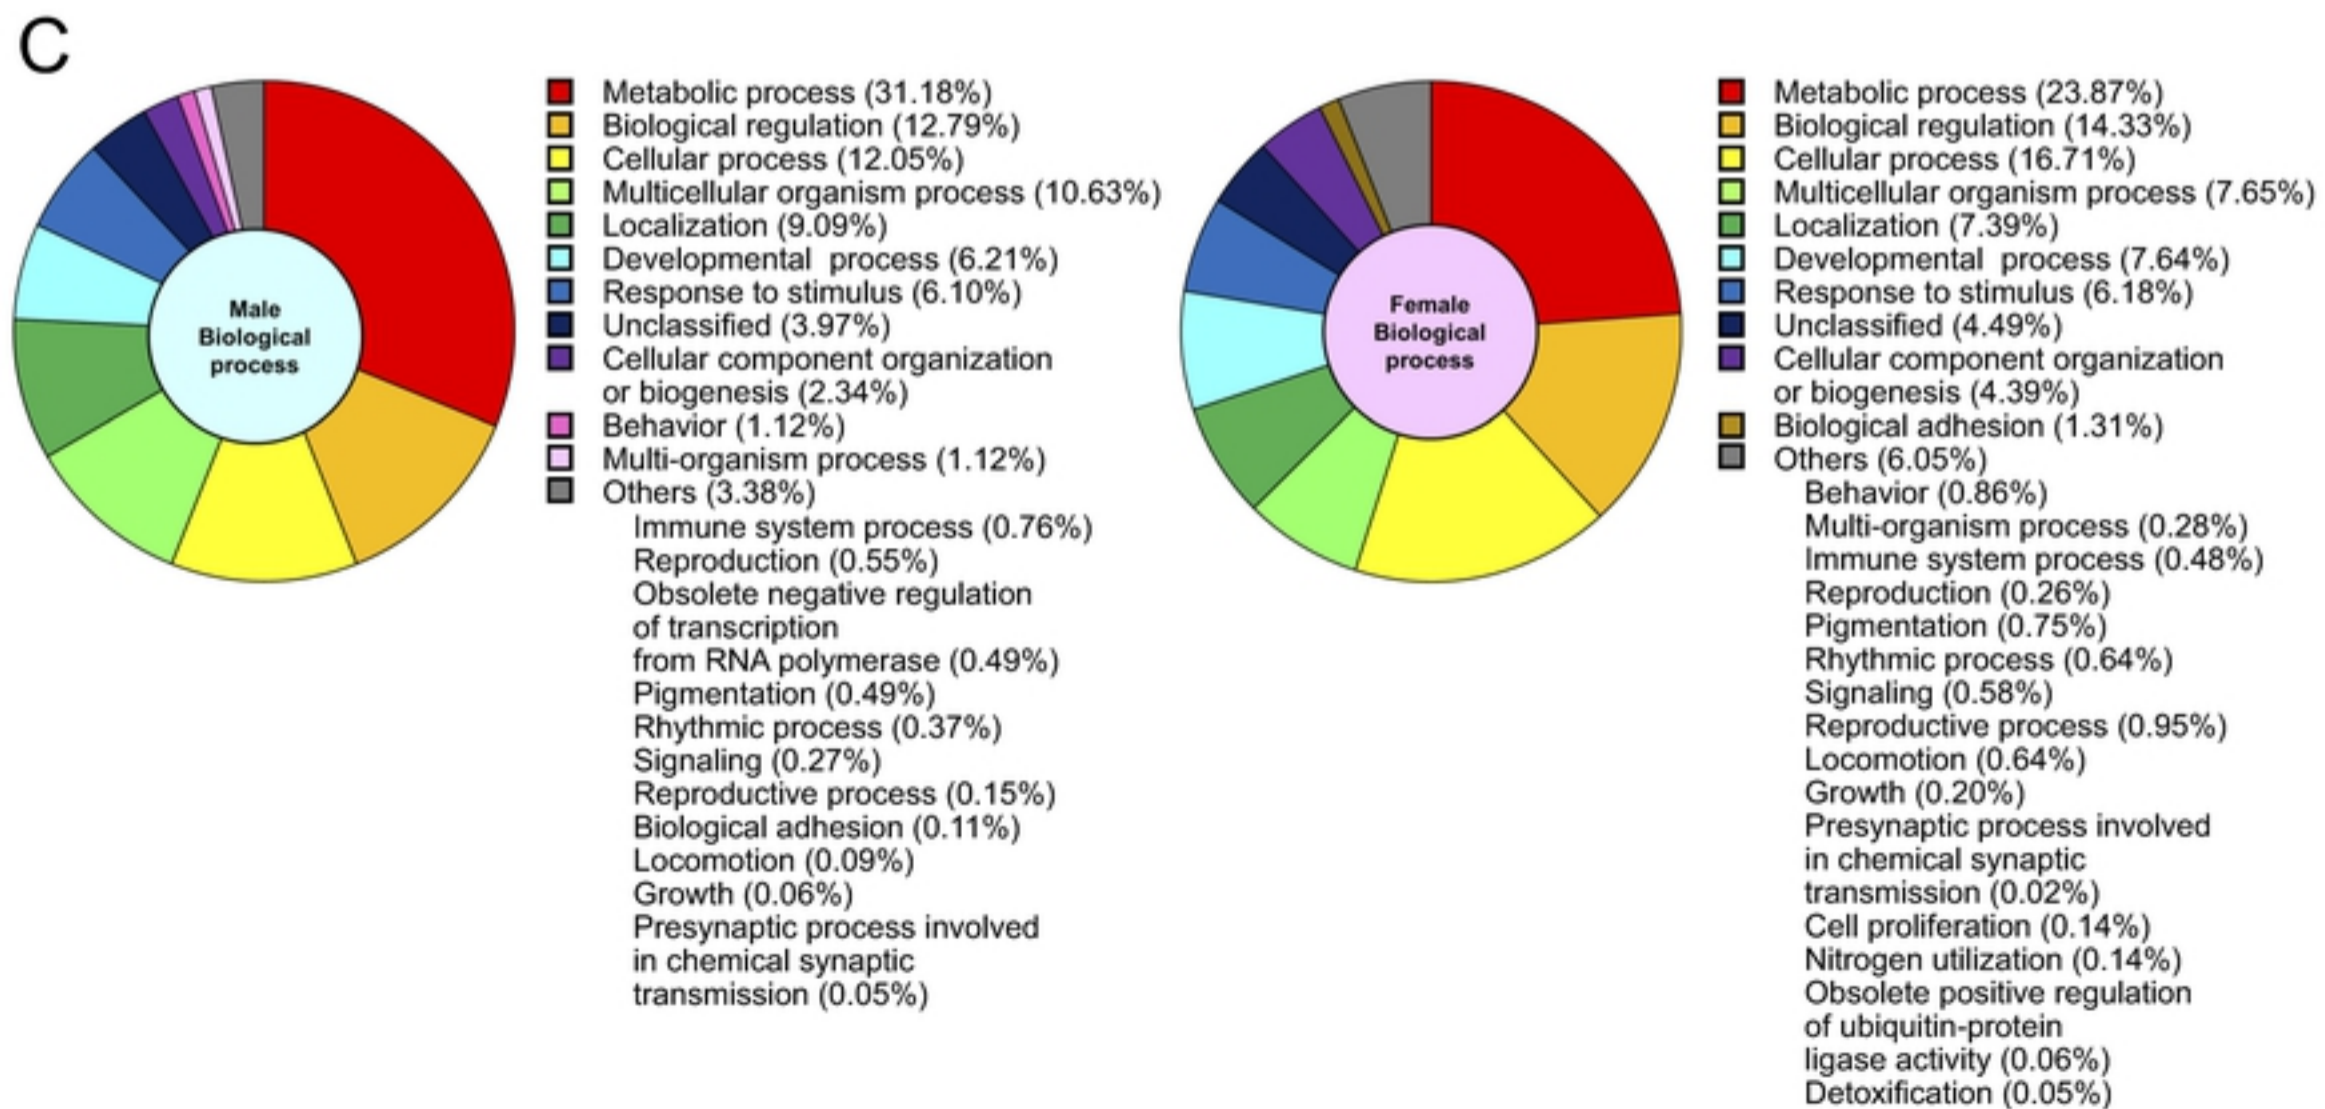

Figure 3
